# Supplementary material for: Homelessness as a predictor of mortality: an 11-year register-based cohort study
Source: Springer Nature journal article supplement (doi:10.1007/s00127-017-1456-z), 2017-11-09
Supplement: MOESM1 [file 15208232]

**Supplementary figure 1**


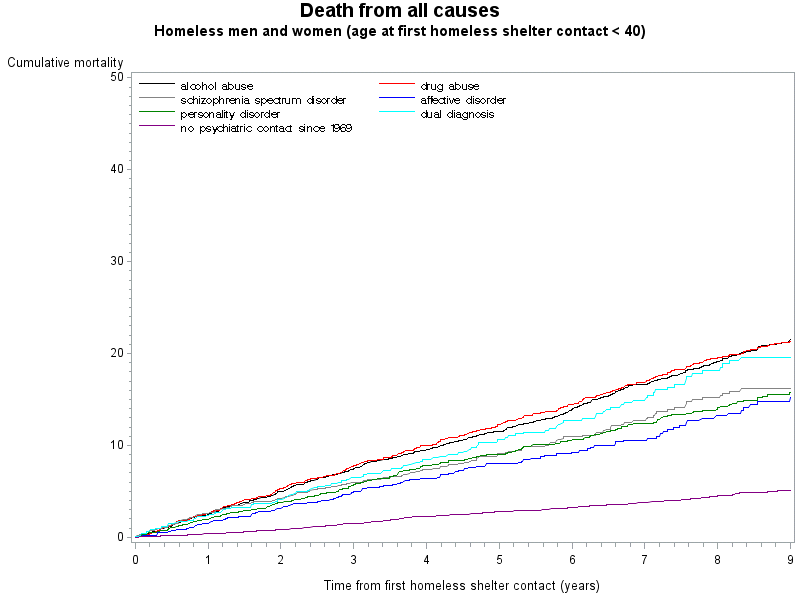


A. Death from all-causes in people using homeless shelters by age at first homeless shelter contact (<40 years)


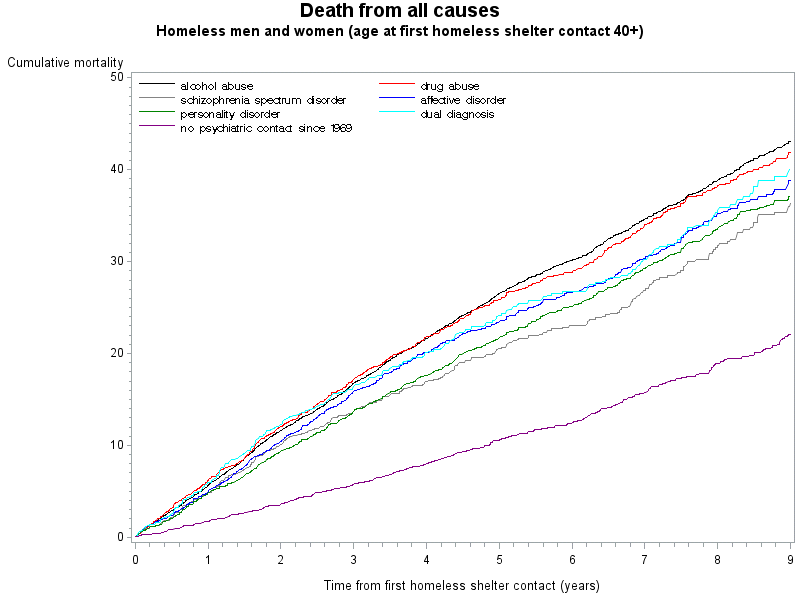


B. Death from all-causes in people using homeless shelters by age at first homeless shelter contact (40+ years)


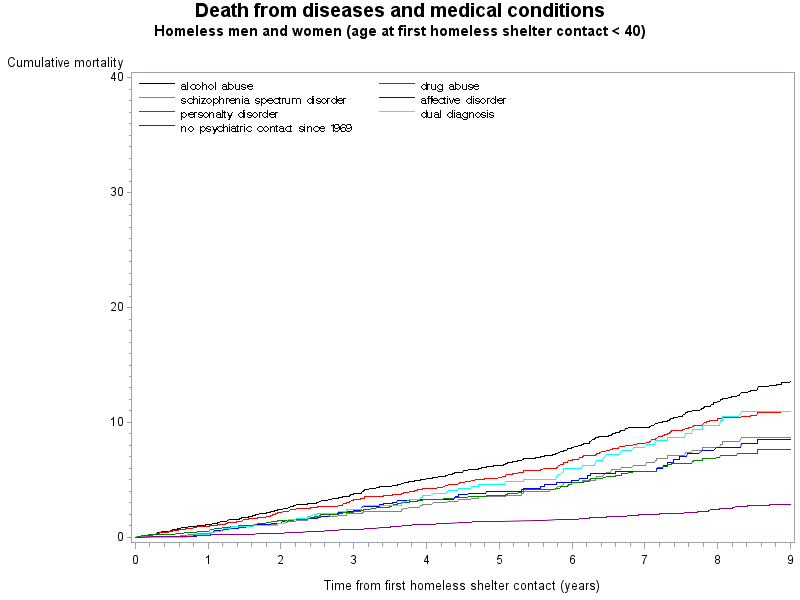


C. Death from diseases and medical conditions in people using homeless shelters by age of first homeless shelter contact (<40 years)
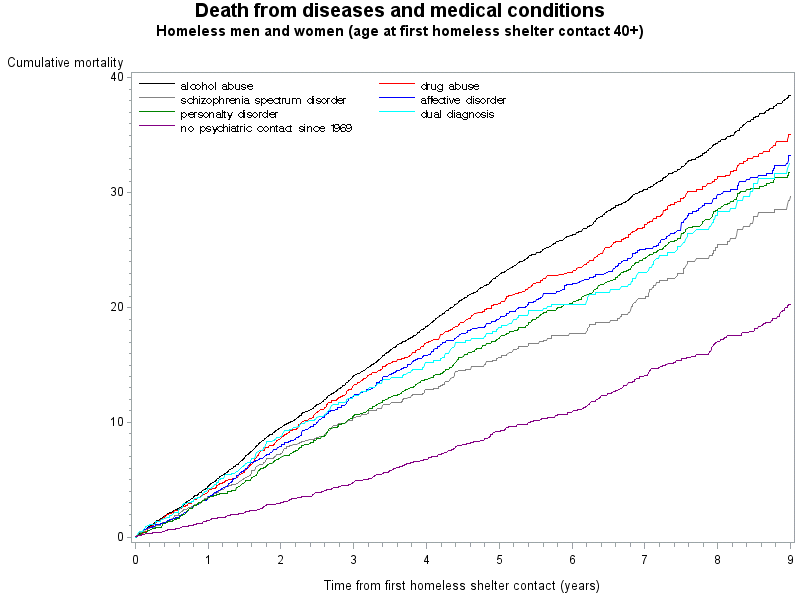


D. Death from diseases and medical conditions in people using homeless shelters by age of first homeless shelter contact (40+ years)
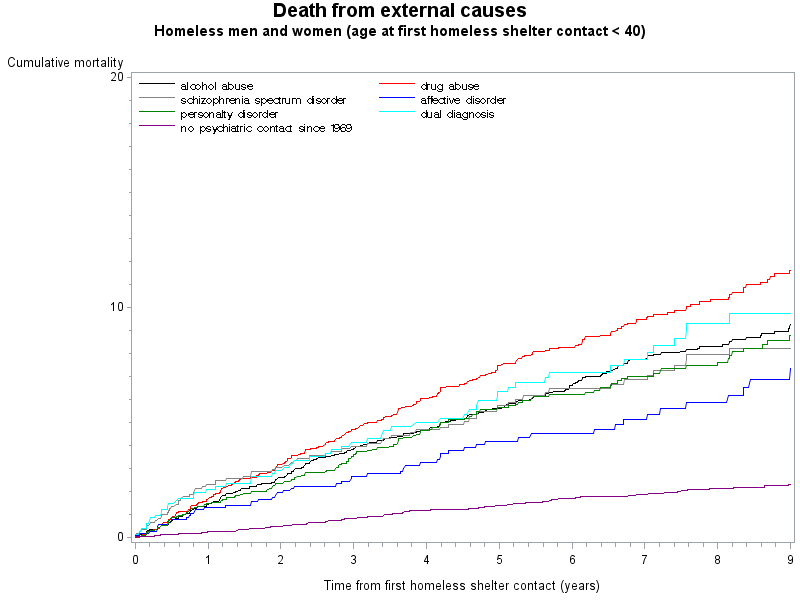


E. Death from external causes in people using homeless shelters by age of first homeless shelter contact (<40 years)


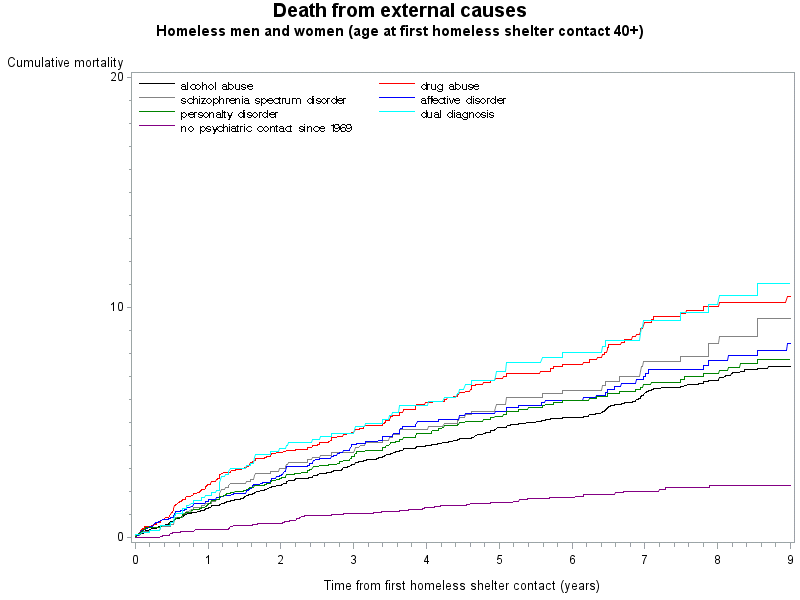


F. Death from external causes in people using homeless shelters by age of first homeless shelter contact (40+ years)

| Adjusted cumulative incidence function estimates (CIFs) of mortality among people with a history of homelessness with or without a psychiatric diagnosis previous to first homeless shelter contact by age at first homeless shelter contact at five years follow-up | | |
| --- | --- | --- |
|  | <40 years at first homeless shelter contact  (N=6,661)a | 40+ years at first homeless shelter contact  (N=3,608)a |
|  | Death from all causes  (N=255) | Death from all causes  (N=506) |
| Psychiatric diagnosis | CIF (95% CI)b | CIF (95% CI)b |
| Alcohol use disorder | 11.51 (10.39–12.57) | 26.55 (25.32–27.54) |
| Drug use disorder | 12.29 (10.99–13.58) | 25.85 (23.86–27.70) |
| Schizophrenia spectrum disorder | 9.06 (7.31–10.89) | 20.54 (17.97–22.80) |
| Affective disorder | 7.99 (6.35–9.74) | 23.50 (21.45–25.38) |
| Personality disorder | 9.05 (7.72–10.41) | 21.76 (19.90–23.44) |
| Dual diagnosisc | 10.67 (8.38–13.07) | 24.18 (21.11–26.99) |
| No psychiatric contact | 2.78 (2.33–3.19) | 10.62 (9.38–11.65) |
|  | Death from diseases and medical conditions  (N=141) | Death from diseases and medical conditions  (N=451) |
| Psychiatric diagnosis | CIF (95% CI)b | CIF (95% CI)b |
| Alcohol use disorder | 6.25 (5.25–8.88) | 22.88 (21.14–23.23) |
| Drug use disorder | 5.22 (4.19–5.91) | 20.36 (17.79–21.26) |
| Schizophrenia spectrum disorder | 3.53 (2.37–4.66) | 15.66 (12.96–17.25) |
| Affective disorder | 3.97 (2.76–5.20) | 19.08 (16.63–20.23) |
| Personality disorder | 3.61 (2.70–4.43) | 17.41 (15.21–18.43) |
| Dual diagnosisc | 4.62 (3.01–6.18) | 18.29 (14.95–20.17) |
| No psychiatric contact | 1.41 (1.10–1.72) | 9.23 (8.00–10.14) |
|  | Death from external causes  (N=114) | Death from external causes  (N=55) |
| Psychiatric diagnosis | CIF (95% CI)b | CIF (95% CI)b |
| Alcohol use disorder | 5.60 (4.69–6.23) | 4.76 (3.77–4.77) |
| Drug use disorder | 7.46 (6.27–8.32) | 6.90 (5.28–7.36) |
| Schizophrenia spectrum disorder | 5.73 (4.31–7.16) | 5.78 (4.08–6.74) |
| Affective disorder | 4.19 (2.98–5.45) | 5.46 (4.08–6.05) |
| Personality disorder | 5.64 (4.51–6.66) | 5.27 (4.00–5.82) |
| Dual diagnosisc | 6.33 (4.53–8.16) | 7.21 (4.97–8.34) |
| No psychiatric contact | 1.38 (1.08–1.68) | 1.52 (1.06–1.93) |
| *CIF* cumulative incidence function  a People were followed until January 1, 2011.  b CIF estimates at 5 years of follow-up.  c People with both a schizophrenia spectrum disorder and a substance use disorder. | | |
